# Supplementary material for: EZH2 Mediates miR‐146a‐5p/HIF‐1α to Alleviate Inflammation and Glycolysis after Acute Spinal Cord Injury
Source: Hindawi journal article supplement (doi:10.1155/2021/5591582), 2021-01-01

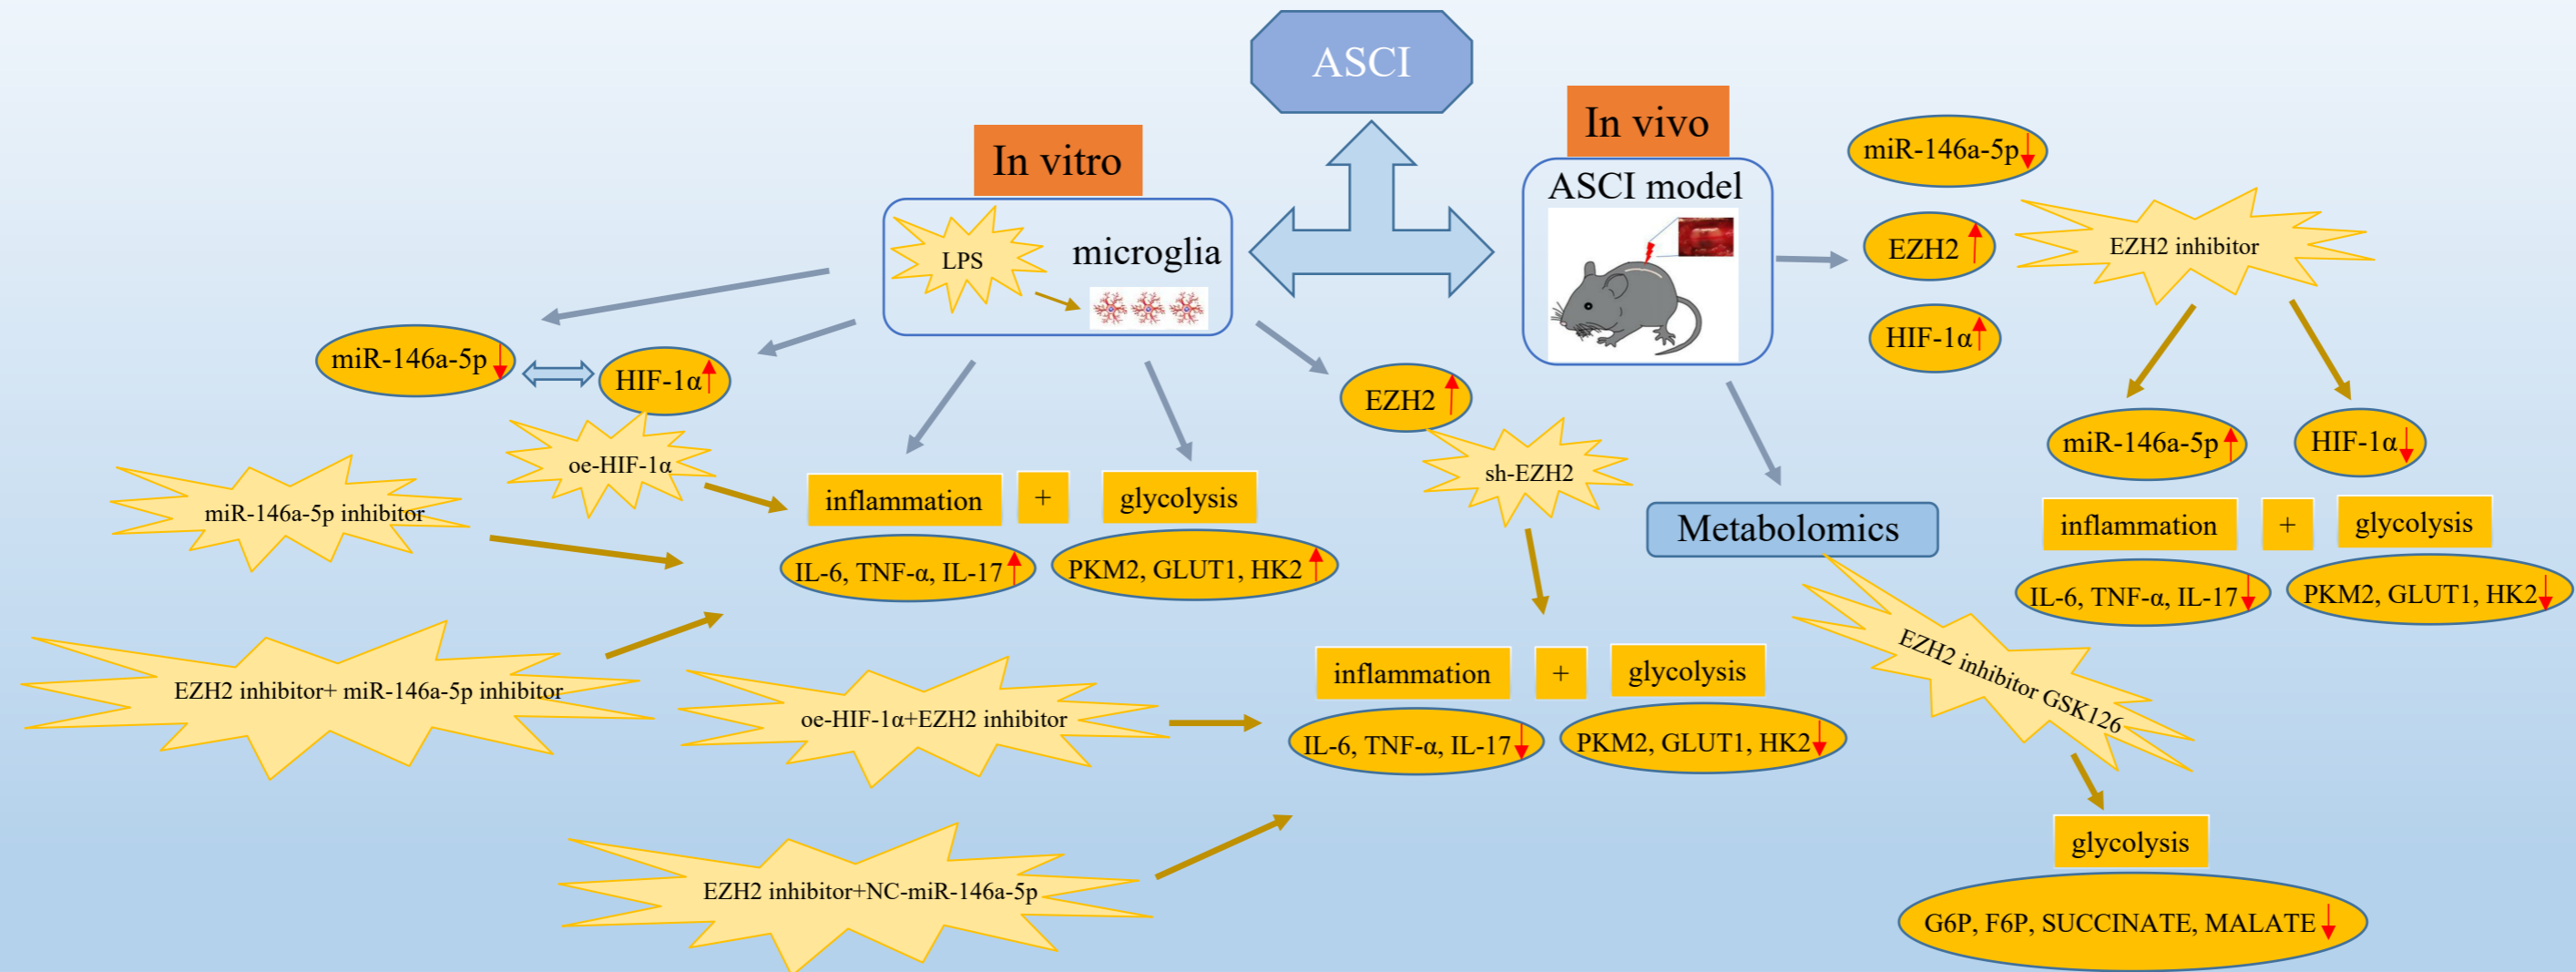

Supplement: f1 [file 5591582.f1.pdf]
